# Supplementary material for: GPR35‐mediated kynurenic acid sensing contributes to maintenance of gut microbiota homeostasis in ulcerative colitis
Source: FEBS Open Bio. 2023 Jul 14;13(8):1415–33. doi: 10.1002/2211-5463.13673 (PMC10392069; doi:10.1002/2211-5463.13673)

## **Supplementary Material**

### **GPR35-mediated kynurenic acid sensing contributes to maintenance of gut microbiota homeostasis in ulcerative colitis**

Di Wang<sup>1,2, †</sup>, Wenbao Wang<sup>4, †</sup>, Xue Bing<sup>2</sup>, Chenguang Xu<sup>2</sup>, Jiahua Qiu<sup>2</sup>, Jiangang Shen<sup>2</sup>, Jinwen Huang<sup>2</sup>, Junda Li<sup>2</sup>, Pi Liu<sup>2</sup>, Biao Xie<sup>2,3\*</sup>

<sup>1</sup> School of Life and Health Technology, Dongguan University of Technology, Dongguan 523808, P.R. China

<sup>2</sup> Department of Gastroenterology, Affiliated Longhua People's Hospital, Southern Medical University (People's Hospital of Longhua), Shenzhen 518109, P.R. China

<sup>3</sup> Department of Gastroenterology, Guangzhou Eighth People's Hospital, Guangzhou Medical University, Guangzhou 510440, P.R. China

<sup>4</sup> College of Pharmacy, Qiqihar Medical University, Qiqihar 161006, P.R. China

\*Correspondence should be addressed to Biao Xie, Chief physician, Department of Gastroenterology, People's Hospital of Longhua, NO.38 Jinglong Construction Road, Longhua District, Shenzhen 518109, China. Tel/Fax: +0755-27741585; E-mail: xiebiaohxq@163.com

<sup>†</sup> These authors contributed equally to this work

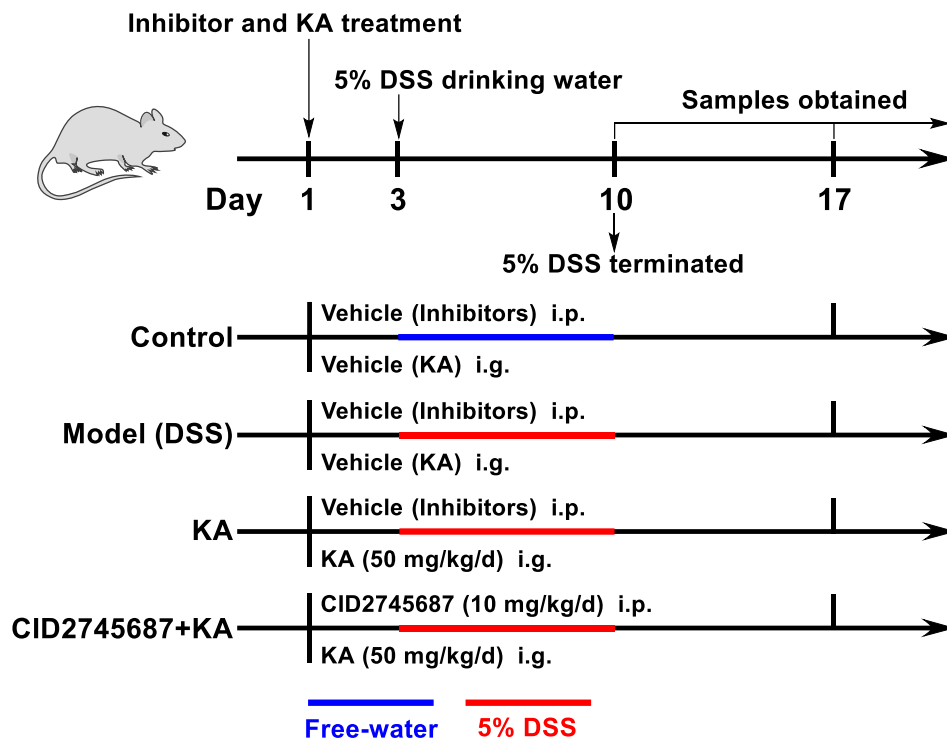

**Figure S1.** Schematic representation of rat disposal process in each group.

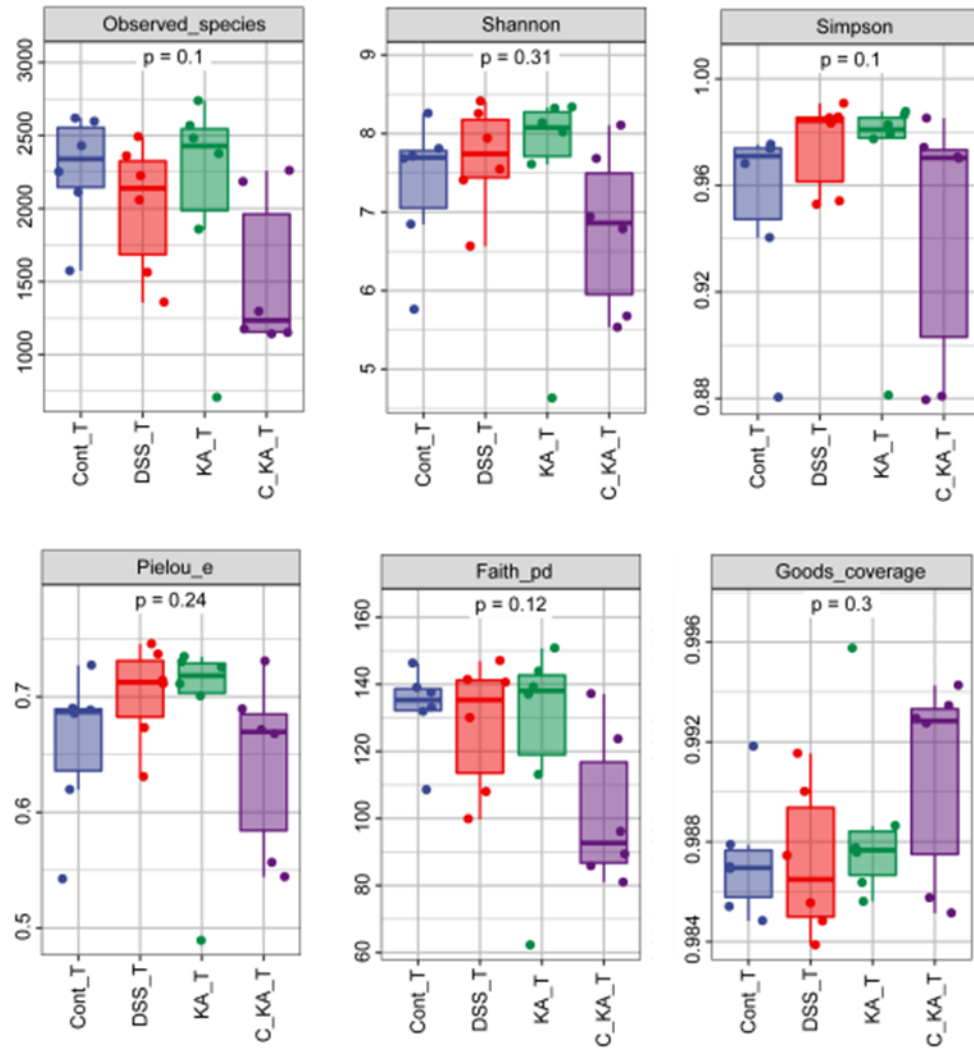

**Figure S2.**  $\alpha$ -diversity analysis of gut microbiota by Observed\_species, Shannon, Simpson, Faith\_pd, Goods\_coverage and Pielou\_e indexes.

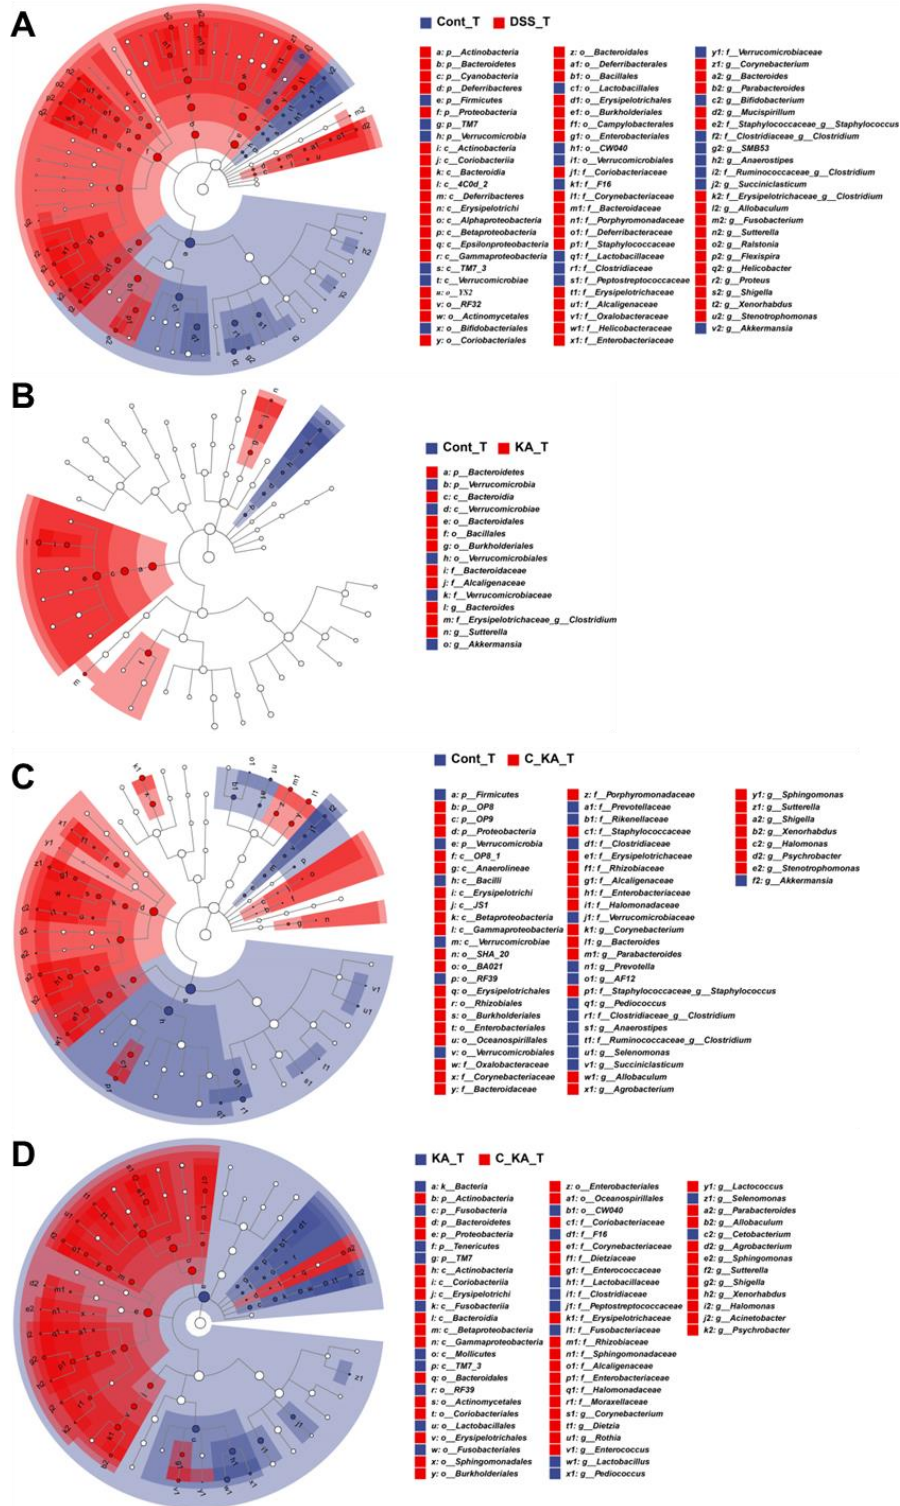

**Figure S3.** The LefSe analysis of the differential gut microbiome in Cont\_T and DSS\_T groups (A), Cont\_T and KA\_T groups (B), Cont\_T and C\_KA\_T groups (C), KA\_T and C\_KA\_T groups (D). The size of the circles was based on the relative abundance, the solid circle represented  $LDA > 3.0$ ,  $p < 0.05$ , and the hollow circle represented  $p > 0.05$ .

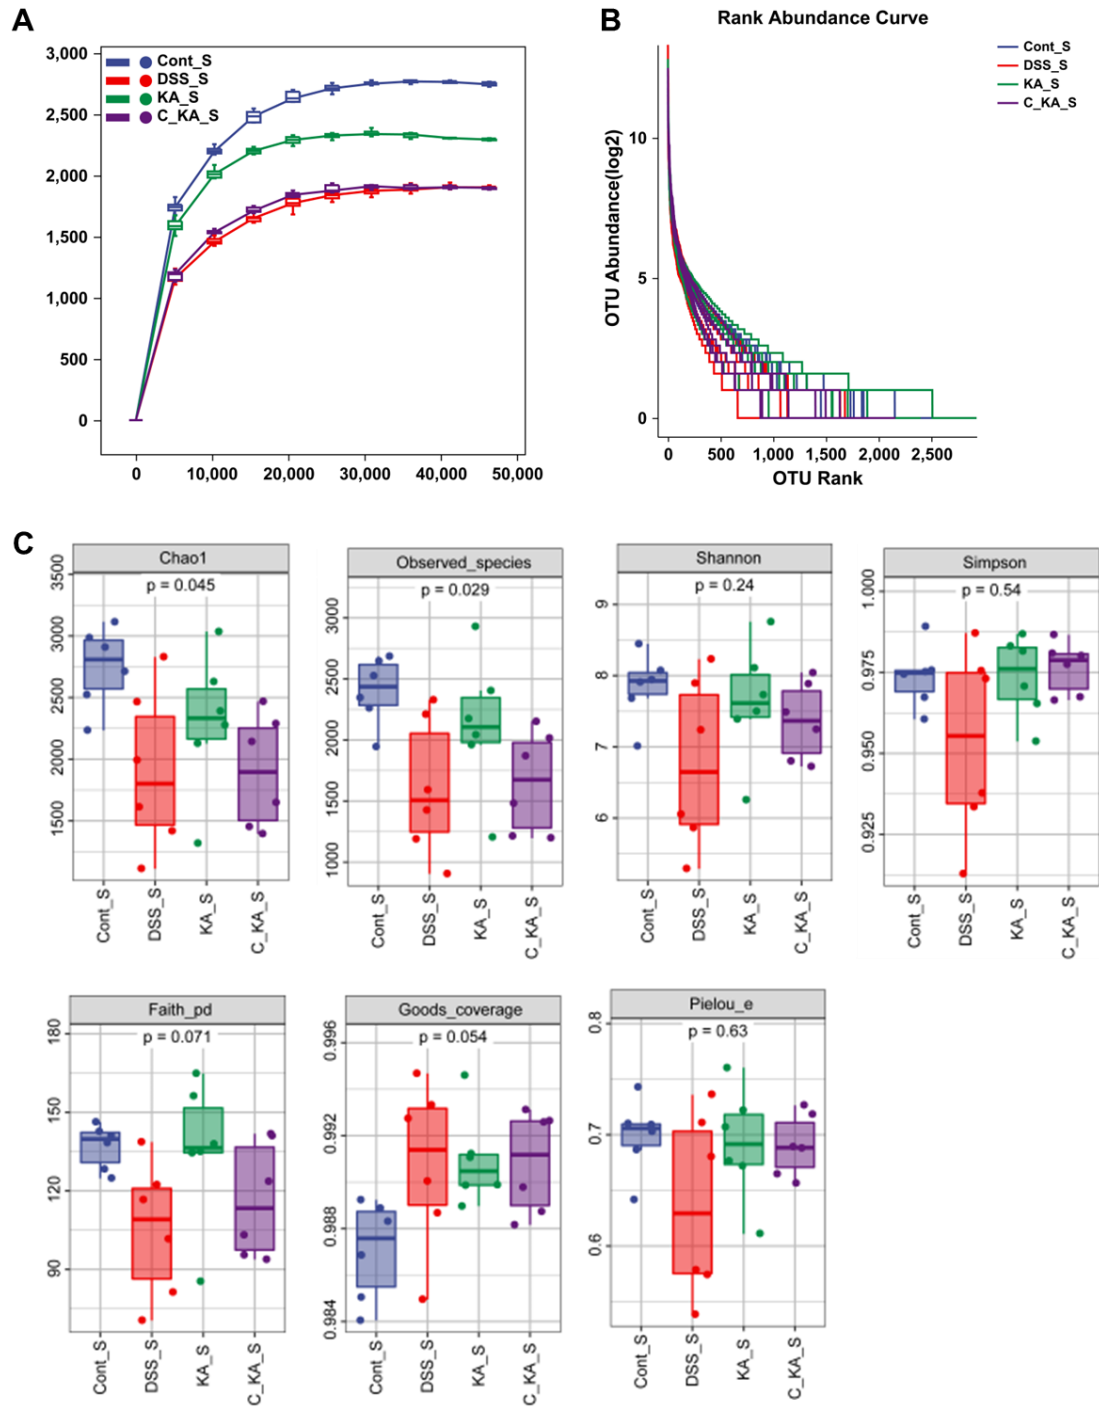

**Figure S4.** (A, B) Rarefaction curve (A) and Rank abundance curve (B) of each group. (C)  $\alpha$ -diversity analysis of gut microbiota by Chao1, Observed\_species, Shannon, Simpson, Faith\_pd, Goods\_coverage and Pielou\_e indexes.

**The raw unedited western blot images presented in Figure 1E**

p-ERK1/2

ERK1/2

$\beta$ -actin

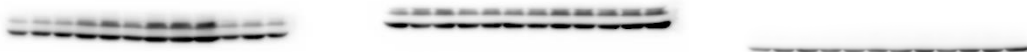

**The raw unedited western blot images presented in Figure 4E**

p-ERK1/2

ERK1/2

$\beta$ -actin

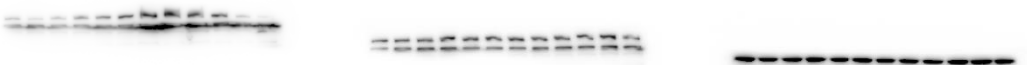

Supplement: Supplementary file 1 — Fig. S1. Schematic representation of rat disposal process in each group. Fig. S2. α‐diversity analysis of gut microbiota by Observed_species, Shannon, Simpson, Faith_pd, Goods_coverage and Pielou_e indexes. Fig. S3. The LEfSe analysis of the differential gut microbiome in Cont_T and DSS_T groups (A), Cont_T and KA_T groups (B), Cont_T and C_KA_T groups (C), KA_T and C_KA_T groups (D). The size of the circles was based on the relative abundance, the solid circle represented LDA >3.0, P < 0.05, and the hollow circle represented P > 0.05. Fig. S4. (A, B) Rarefaction curve (A) and Rank abundance curve (B) of each group. (C) α‐diversity analysis of gut microbiota by Chao1, Observed_species, Shannon, Simpson, Faith_pd, Goods_coverage and Pielou_e indexes. [file FEB4-13-1415-s001.pdf]
